# Supplementary material for: Effective doping by spin-coating and enhanced thermoelectric power factors in SWCNT/P3HT hybrid films
Source: Royal Society of Chemistry journal article supplement (doi:10.1039/c5ta02443a), 2015-01-01
Supplement: c5ta02443a1.pdf [file c5ta02443a1.pdf]

## Electronic Supplementary Information (ESI)

Effective doping by spin-coating and enhanced thermoelectric power factors in  
SWCNT/P3HT hybrid films

Cheon Taek Hong,<sup>†ab</sup> Woohwa Lee,<sup>†a</sup> Young Hun Kang,<sup>a</sup> Youngjae Yoo,<sup>a</sup> Juwhan Ryu,<sup>b</sup>  
Song Yun Cho<sup>\*a</sup> and Kwang-Suk Jang<sup>\*a</sup>

*<sup>a</sup>Division of Advanced Materials, Korea Research Institute of Chemical Technology, Daejeon  
305-600, Republic of Korea. E-mail: kjang@kRICT.re.kr; scho@kRICT.re.kr*

*<sup>b</sup>Department of Polymer Science and Engineering, Chungnam National University, Daejeon  
305-764, Republic of Korea*

\*E-mail: kjang@kRICT.re.kr (K.-S.J.); scho@kRICT.re.kr (S.Y.C.).

<sup>†</sup>These authors equally contributed.

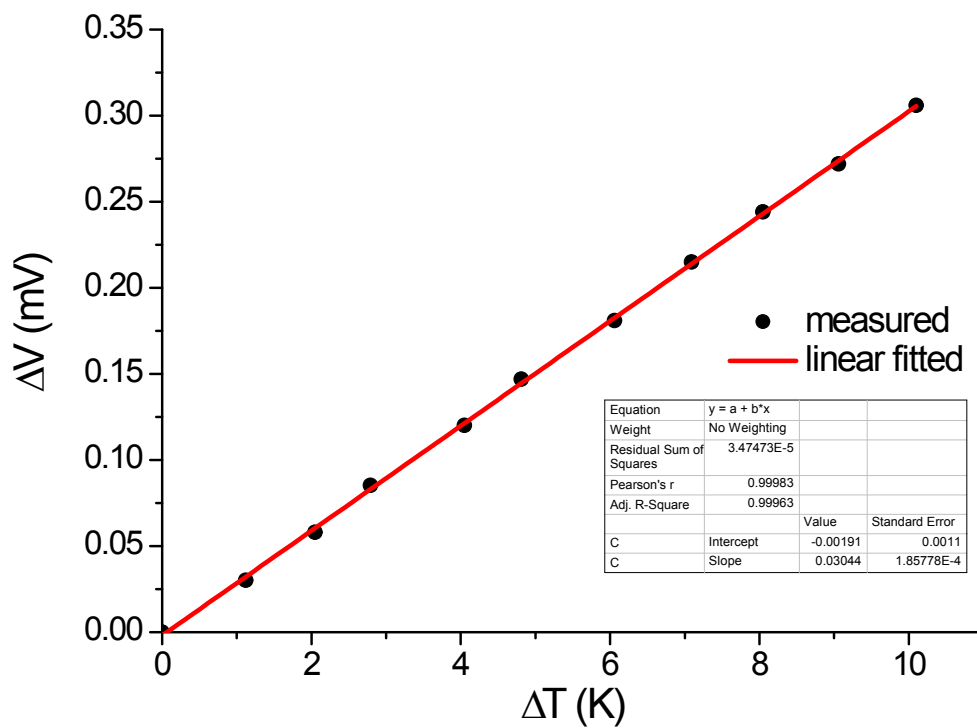

**Fig. S1** Potential difference  $\Delta V$  as a function of  $\Delta T$  between the two electrodes deposited on the bar-coated SWCNT/P3HT hybrid film doped by spin-coating.

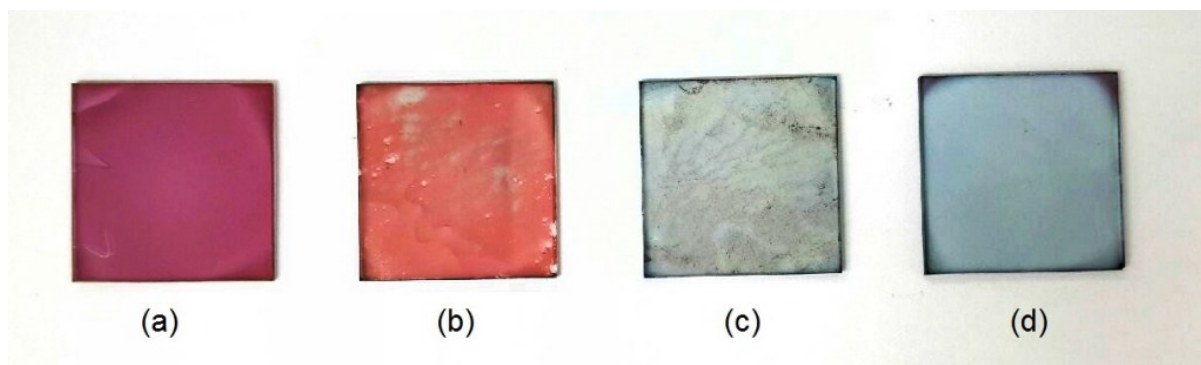

**Fig. S2** Photographs images of the P3HT films (a) undoped, (b) doped by immersion and

rinsed with methanol, (c) doped by immersion and not rinsed, and (d) doped by spin-coating.
